# Supplementary material for: High current density electrodeposition of silver from silver-containing liquid metal salts with pyridine-N-oxide ligands
Source: Royal Society of Chemistry journal article supplement (doi:10.1039/c3dt52416g), 2013-10-24
Supplement: c3dt52416g.pdf [file c3dt52416g.pdf]

*Electronic supporting information*

High current density electrodeposition of silver from silver-  
containing liquid metal salts with pyridine-*N*-oxide ligands

Jeroen Sniekers,<sup>a</sup> Neil R. Brooks,<sup>a</sup> Stijn Schaltin,<sup>b</sup> Luc Van Meervelt,<sup>a</sup> Jan Fransaer<sup>b</sup> and

Koen Binnemans<sup>\*a</sup>

Table S1: Selected bond lengths and interatomic distances in the crystal structures of  $\alpha$ -[Ag(py-O)<sub>3</sub>][Tf<sub>2</sub>N],  $\beta$ -[Ag(py-O)<sub>3</sub>][Tf<sub>2</sub>N], [Ag<sub>3</sub>(py-O)<sub>8</sub>][OTf]<sub>3</sub>, [Ag(py-O)<sub>2</sub>][OMs] and [Ag(py-O)<sub>2</sub>][NO<sub>3</sub>].

| Compound                                              | Ag-O      | Distance (Å) | Ag-Ag      | Distance (Å) | Compound                                                 | Ag-O                                       | Distance (Å) | Ag-Ag     | Distance (Å) |
|-------------------------------------------------------|-----------|--------------|------------|--------------|----------------------------------------------------------|--------------------------------------------|--------------|-----------|--------------|
| $\alpha$ -[Ag(py-O) <sub>3</sub> ][Tf <sub>2</sub> N] | Ag1 - O7  | 2.455(4)     | Ag1 - Ag2  | 3.247(1)     | [Ag <sub>3</sub> (py-O) <sub>8</sub> ][OTf] <sub>3</sub> | Ag1 - O1                                   | 2.271(3)     | Ag1 - Ag2 | 3.2915(5)    |
|                                                       | Ag1 - O8  | 2.490(4)     | Ag2 - Ag3  | 3.1054(8)    |                                                          | Ag1 - O8                                   | 2.599(3)     | Ag2 - Ag3 | 3.3210(5)    |
|                                                       | Ag2 - O8  | 2.444(4)     | Ag3 - Ag4  | 3.2004(8)    |                                                          | Ag1 - O15                                  | 2.477(3)     |           |              |
|                                                       | Ag2 - O9  | 2.489(3)     | Ag4 - Ag1  | 3.0244(7)    |                                                          | Ag1 - O22                                  | 2.459(3)     |           |              |
|                                                       | Ag3 - O9  | 2.494(3)     | Ag5 - Ag6  | 3.2300(8)    |                                                          | Ag1 - O29                                  | 2.409(3)     |           |              |
|                                                       | Ag3 - O10 | 2.449(3)     | Ag5 - Ag6  | 3.0586(8)    |                                                          | Ag2 - O8                                   | 2.478(3)     |           |              |
|                                                       | Ag4 - O7  | 2.527(4)     |            |              |                                                          | Ag2 - O15                                  | 2.559(3)     |           |              |
|                                                       | Ag4 - O10 | 2.451(3)     |            |              |                                                          | Ag2 - O22                                  | 2.448(3)     |           |              |
|                                                       | Ag5 - O11 | 2.463(3)     |            |              |                                                          | Ag2 - O43                                  | 2.413(3)     |           |              |
|                                                       | Ag5 - O12 | 2.499(3)     |            |              |                                                          | Ag2 - O36                                  | 2.488(3)     |           |              |
|                                                       | Ag6 - O11 | 2.461(3)     |            |              |                                                          | Ag2 - O43                                  | 2.413(3)     |           |              |
|                                                       | Ag6 - O12 | 2.491(3)     |            |              |                                                          | Ag3 - O15                                  | 2.444(3)     |           |              |
| $\beta$ -[Ag(py-O) <sub>3</sub> ][Tf <sub>2</sub> N]  | Ag1 - O1  | 2.4842(2)    | Ag1 - Ag2  | 3.1508(3)    | [Ag(py-O) <sub>3</sub> ][OTf]                            | Ag3 - O29                                  | 2.556(4)     | Ag1 - Ag1 | 3.0191(2)    |
|                                                       | Ag2 - O1  | 2.4722(2)    | Ag2 - Ag3  | 3.1598(4)    |                                                          | Ag3 - O36                                  | 2.333(3)     |           |              |
|                                                       | Ag2 - O2  | 2.4905(2)    | Ag3 - Ag4  | 3.2238(4)    |                                                          | Ag3 - O43                                  | 2.632(3)     |           |              |
|                                                       | Ag3 - O2  | 2.4748(2)    | Ag4 - Ag5  | 3.0803(4)    |                                                          | Ag3 - O50                                  | 2.248(3)     |           |              |
|                                                       | Ag3 - O3  | 2.4665(2)    | Ag5 - Ag6  | 3.0522(4)    |                                                          | Ag1 - O2                                   | 2.4621(1)    |           |              |
|                                                       | Ag4 - O3  | 2.4490(2)    | Ag6 - Ag7  | 3.1935(4)    |                                                          | Ag1 - O2                                   | 2.5117(1)    |           |              |
|                                                       | Ag4 - O4  | 2.4918(2)    | Ag7 - Ag8  | 3.1039(4)    | Ag1 - O3                                                 | 2.3651(1)                                  |              |           |              |
|                                                       | Ag5 - O4  | 2.4806(2)    | Ag8 - Ag9  | 3.0418(4)    | Ag1 - O4                                                 | 2.3957(1)                                  |              |           |              |
|                                                       | Ag5 - O5  | 2.513(2)     | Ag9 - Ag10 | 3.2032(3)    | Ag1 - O4i                                                | 2.4892(1)                                  |              |           |              |
|                                                       | Ag6 - O5  | 2.490(2)     | Ag10 - Ag9 | 3.2036(3)    | [Ag(py-O) <sub>2</sub> ][OMs]                            | Ag1 - O2                                   | 2.4108(2)    |           |              |
|                                                       | Ag6 - O6  | 2.4587(2)    |            |              |                                                          | Ag1 - O3                                   | 2.3386(1)    |           |              |
|                                                       | Ag7 - O6  | 2.4762(2)    |            |              |                                                          | Ag1 - O3                                   | 2.3430(1)    |           |              |
|                                                       | Ag7 - O7  | 2.4898(2)    |            |              |                                                          | Ag1 - O4                                   | 2.4961(1)    |           |              |
|                                                       | Ag8 - O7  | 2.4893(2)    |            |              |                                                          | Ag1 - O4                                   | 2.5828(1)    |           |              |
|                                                       | Ag8 - O8  | 2.4799(2)    |            |              |                                                          | [Ag(py-O) <sub>2</sub> ][NO <sub>3</sub> ] | Ag1 - O2     | 2.5225(1) |              |
|                                                       | Ag9 - O8  | 2.4900(2)    |            |              | Ag1 - O2                                                 |                                            | 2.3228(1)    |           |              |
|                                                       | Ag9 - O9  | 2.4664(2)    |            |              | Ag1 - O3                                                 |                                            | 2.2958(1)    |           |              |
|                                                       | Ag10 - O9 | 2.4698(2)    |            |              | Ag1 - O4                                                 |                                            | 2.5193(1)    |           |              |
|                                                       |           |              |            | Ag1 - O5     | 2.4253(1)                                                |                                            |              |           |              |
|                                                       |           |              |            |              |                                                          |                                            |              |           |              |

Table S2:  $\pi$ - $\pi$  interactions for the different compounds. The lettering of the planes is presented in the respective figures of the compounds.

| Compound                                                 | Planes                         | Angle (°) | centroid-centroid distance (Å) | shift (Å)                 |
|----------------------------------------------------------|--------------------------------|-----------|--------------------------------|---------------------------|
| $\alpha$ -[Ag(py-O) <sub>3</sub> ][Tf <sub>2</sub> N]    | A-B <sup>i</sup>               | 4.3       | 3.608                          | 1.474                     |
| $\beta$ -[Ag(py-O) <sub>3</sub> ][Tf <sub>2</sub> N]     | A-Q <sup>ii</sup>              | 4.0       | 3.714                          | 1.753                     |
|                                                          | B-C <sup>iii</sup>             | 8.0       | 3.583                          | 1.121                     |
|                                                          | E-F <sup>iv</sup>              | 4.8       | 3.788                          | 2.052                     |
|                                                          | F-G <sup>v</sup>               | 2.5       | 3.649                          | 1.580                     |
|                                                          | G-H <sup>vi</sup>              | 5.0       | 3.891                          | 2.101                     |
|                                                          | I-J <sup>vii</sup>             | 1.9       | 3.870                          | 1.923                     |
|                                                          | J-K <sup>viii</sup>            | 3.7       | 3.668                          | 1.621                     |
|                                                          | K-L <sup>ix</sup>              | 5.0       | 3.802                          | 1.879                     |
|                                                          | N-O <sup>x</sup>               | 9.2       | 3.575                          | 1.459                     |
| [Ag <sub>3</sub> (py-O) <sub>8</sub> ][OTf] <sub>3</sub> | A-B <sup>xi</sup>              | 6.3       | 3.883                          | 2.219                     |
|                                                          | C-F <sup>xii</sup>             | 3.1       | 3.606                          | 1.071                     |
|                                                          | C-F <sup>xiii</sup>            | 3.1       | 3.778                          | 1.911                     |
|                                                          | D-G <sup>xiv</sup>             | 9.4       | 3.503                          | 0.940                     |
|                                                          | D-G <sub>1</sub> <sup>xv</sup> | 9.4       | 3.715                          | 1.228                     |
|                                                          | E-H <sup>xvi</sup>             | 2.6       | 3.693                          | 1.598                     |
| [Ag(py-O) <sub>3</sub> ][OTf]                            | A-C <sup>xvii</sup>            | 15.7      | 3.799                          | 1.797                     |
|                                                          | B-C <sup>xviii</sup>           | 13.8      | 3.714                          | 0.812                     |
| [Ag(py-O) <sub>2</sub> ][OMs]                            | A-A <sup>xix</sup>             | 0         | 3.804                          | 1.969                     |
|                                                          | A-B <sup>xx</sup>              | 9.0       | 3.533                          | 0.995                     |
| [Ag(py-O) <sub>2</sub> ][NO <sub>3</sub> ]               | A-B <sup>xxi</sup>             | 2.8       | 3.668                          | 1.671                     |
| Symmetry operations:                                     |                                |           |                                |                           |
| <i>i</i>                                                 | 1-x, +x-y, +z                  |           | <i>xiii</i>                    | +x, +y, +z                |
| <i>ii</i>                                                | +y-x, 1-x, 1+z                 |           | <i>xiv</i>                     | -1+x, +y, +z              |
| <i>iii</i>                                               | +x, +y, +z                     |           | <i>xv</i>                      | +x, +y, +z                |
| <i>iv</i>                                                | +x, +y, +z                     |           | <i>xvi</i>                     | +x, +y, +z                |
| <i>v</i>                                                 | +x, +y, +z                     |           | <i>xvii</i>                    | 3/4-y, 1/4+x, 1/4+z       |
| <i>vi</i>                                                | +y-x, 1-x, +z                  |           | <i>xviii</i>                   | -1/4+y, 3/4-x, -<br>1/4+z |
| <i>vii</i>                                               | +y-x, 1-x, +z                  |           | <i>xix</i>                     | 2-x, 2-y, -z              |
| <i>viii</i>                                              | 1-y, 1+x, +z                   |           | <i>xx</i>                      | +x, +y, +z                |
| <i>ix</i>                                                | +y-x, 1-x, +z                  |           | <i>xxi</i>                     | -x, 1-y, 1-z              |
| <i>x</i>                                                 | +x, +y, +z                     |           |                                |                           |
| <i>xi</i>                                                | +x, +y, +z                     |           |                                |                           |
| <i>xii</i>                                               | -1+x, +y, +z                   |           |                                |                           |

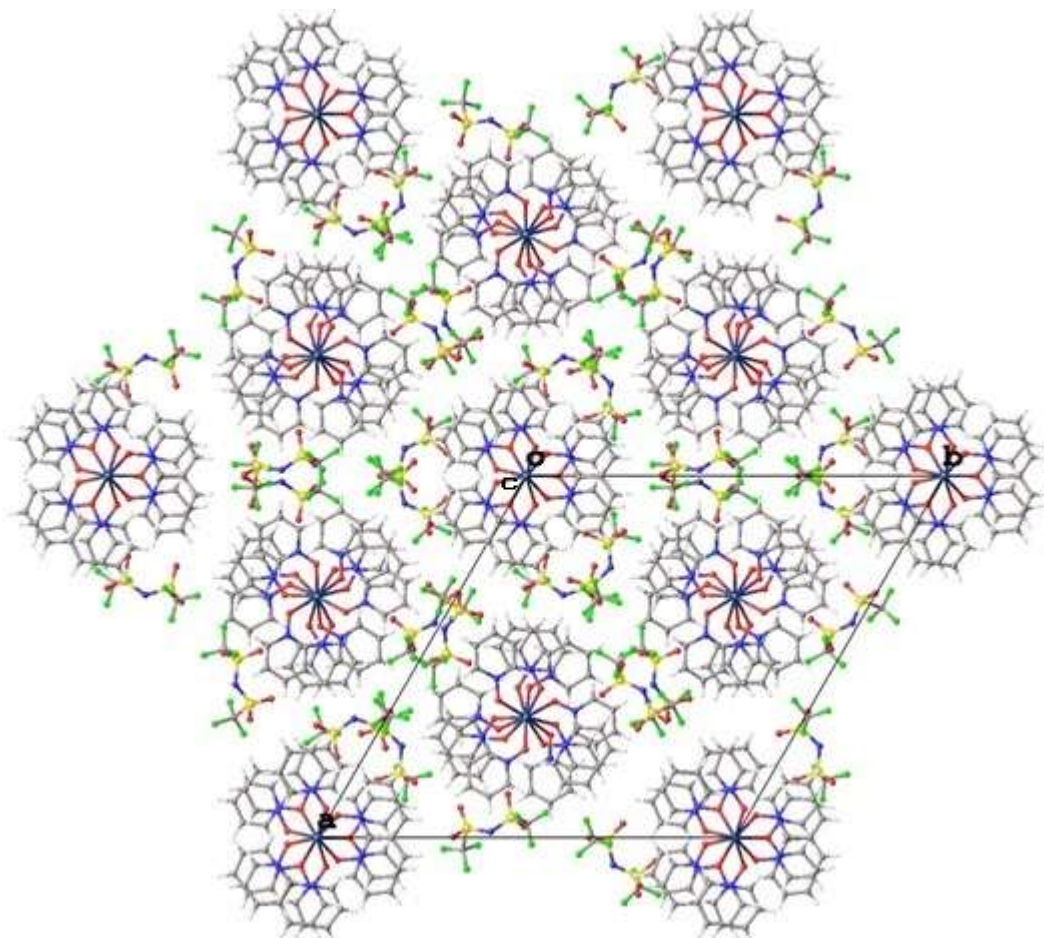

Figure S1: View along the  $c$  axis of the packing in the crystal structure of  $\alpha$ -[Ag(py-O)<sub>3</sub>][Tf<sub>2</sub>N] showing the two different [Ag(py-O)<sub>3</sub>]<sub>∞</sub> chains with the bis(trifluoromethanesulfonyl)imide anions in between. Disorder of the anions is omitted for clarity.

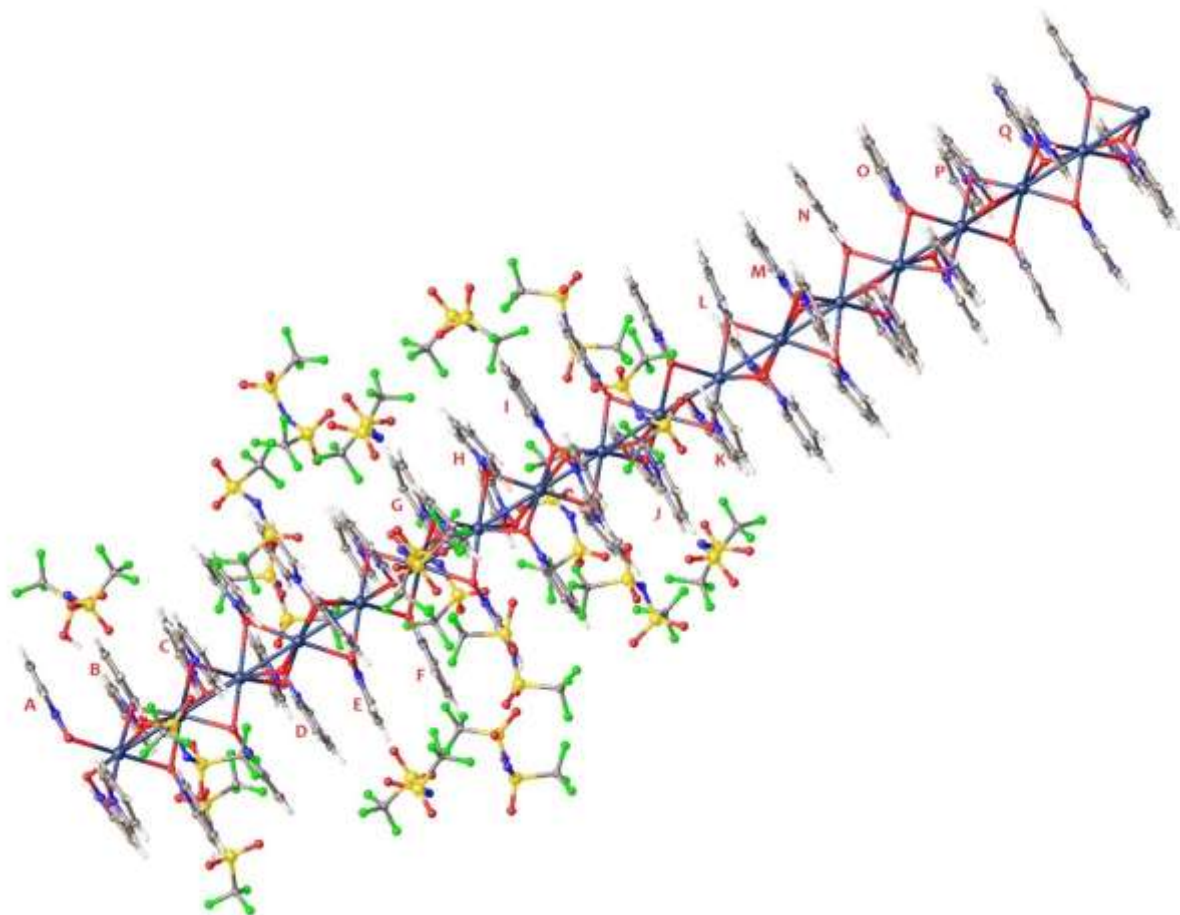

Figure S2: View of the crystal structure of  $\beta$ -[Ag(py-O)<sub>3</sub>][Tf<sub>2</sub>N] showing the Ag...Ag interactions. Disorder of the anions is omitted for clarity.

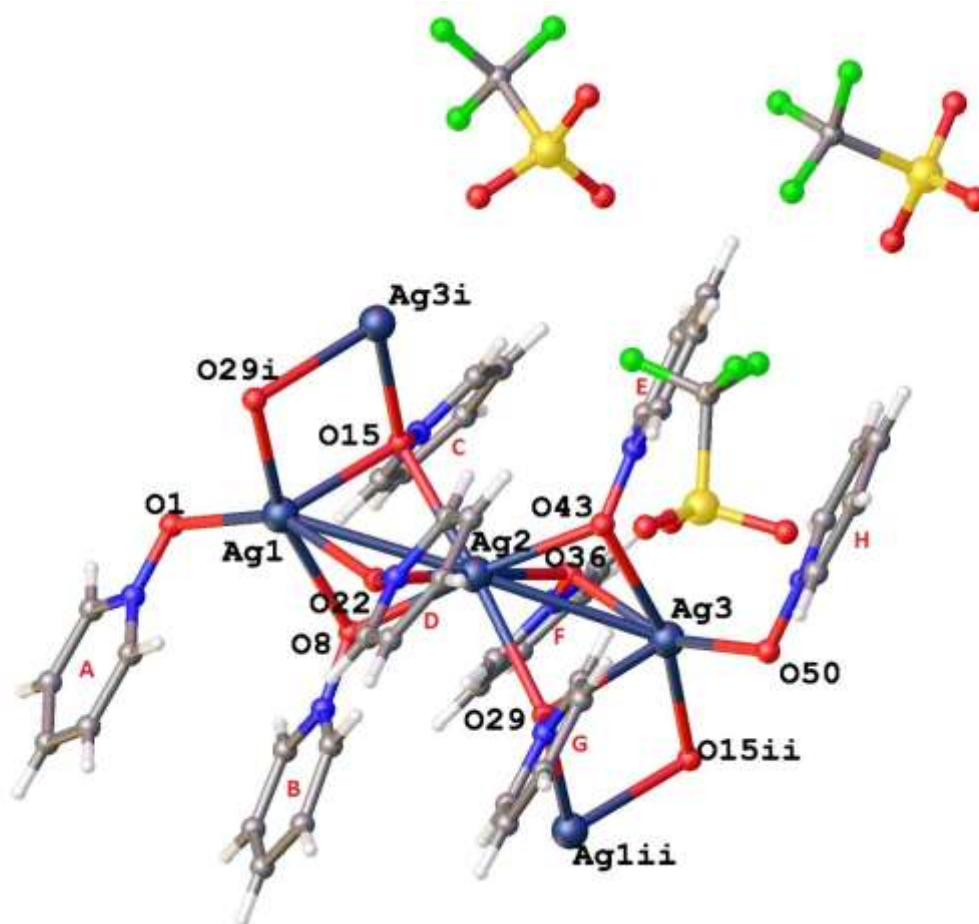

Figure S3: View of the crystal structure of  $[Ag_3(py-O)_8][OTf]_3$  showing the coordination environment of the silver centres and the bridging nature of the py-O ligands. (symmetry codes: i  $1-x, y, z$ ; ii  $1+x, y, z$ ).

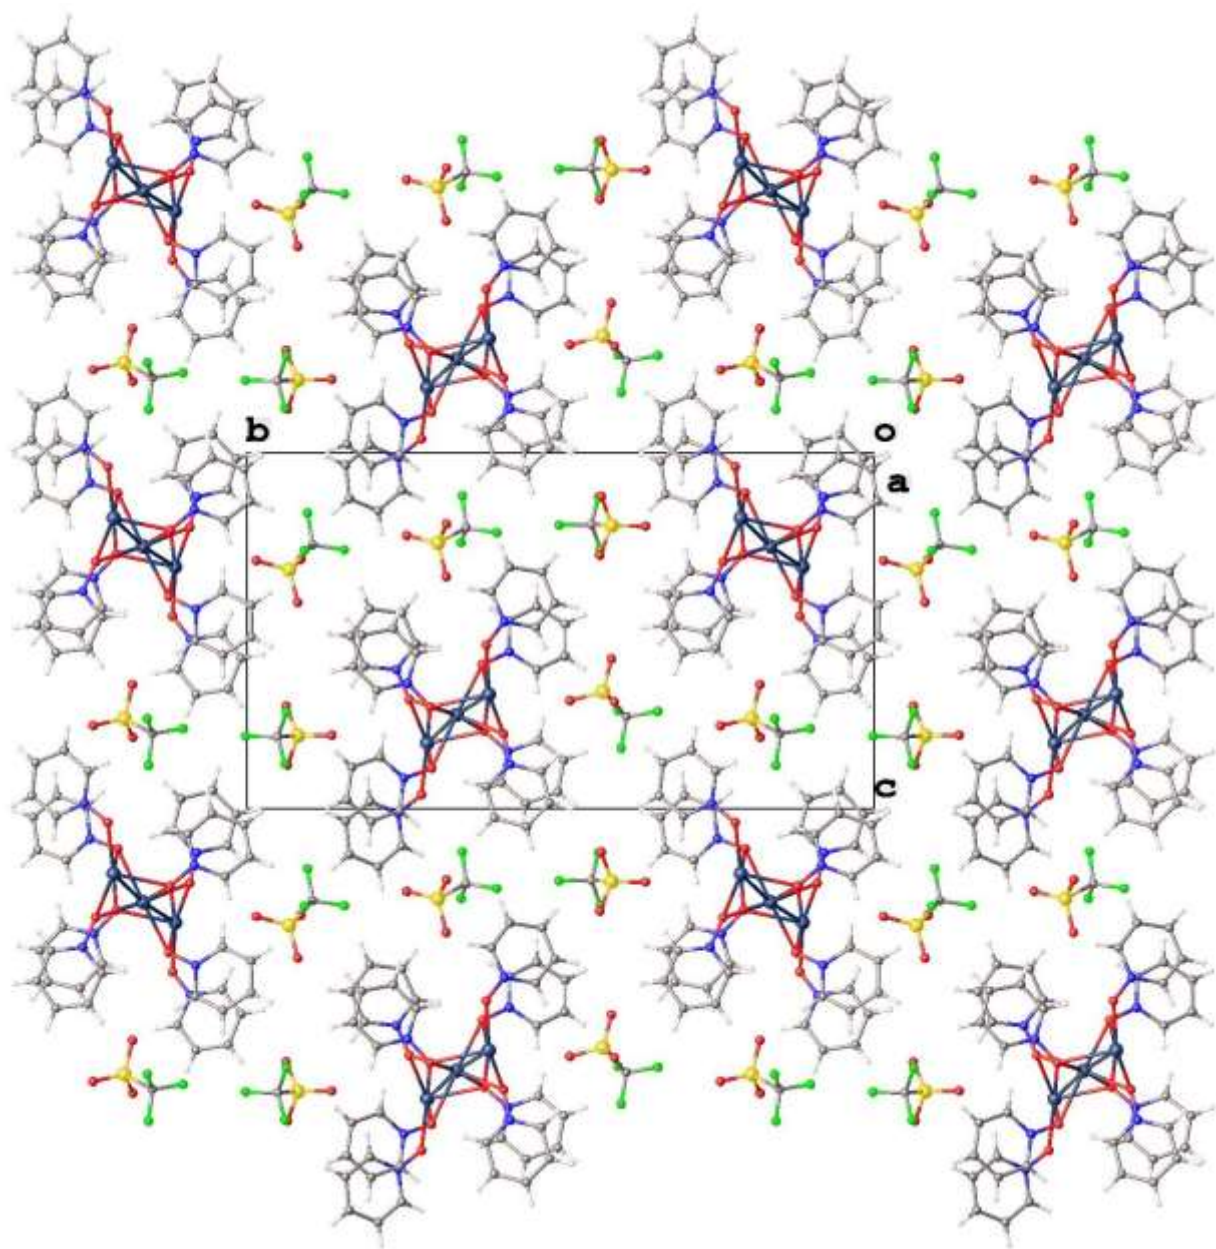

Figure S4: View of the packing in the crystal structure of  $[\text{Ag}_3(\text{py-O})_8][\text{OTf}]_3$  showing the  $\pi$ - $\pi$  interactions and the packing of the chains and uncoordinated OTf anions.





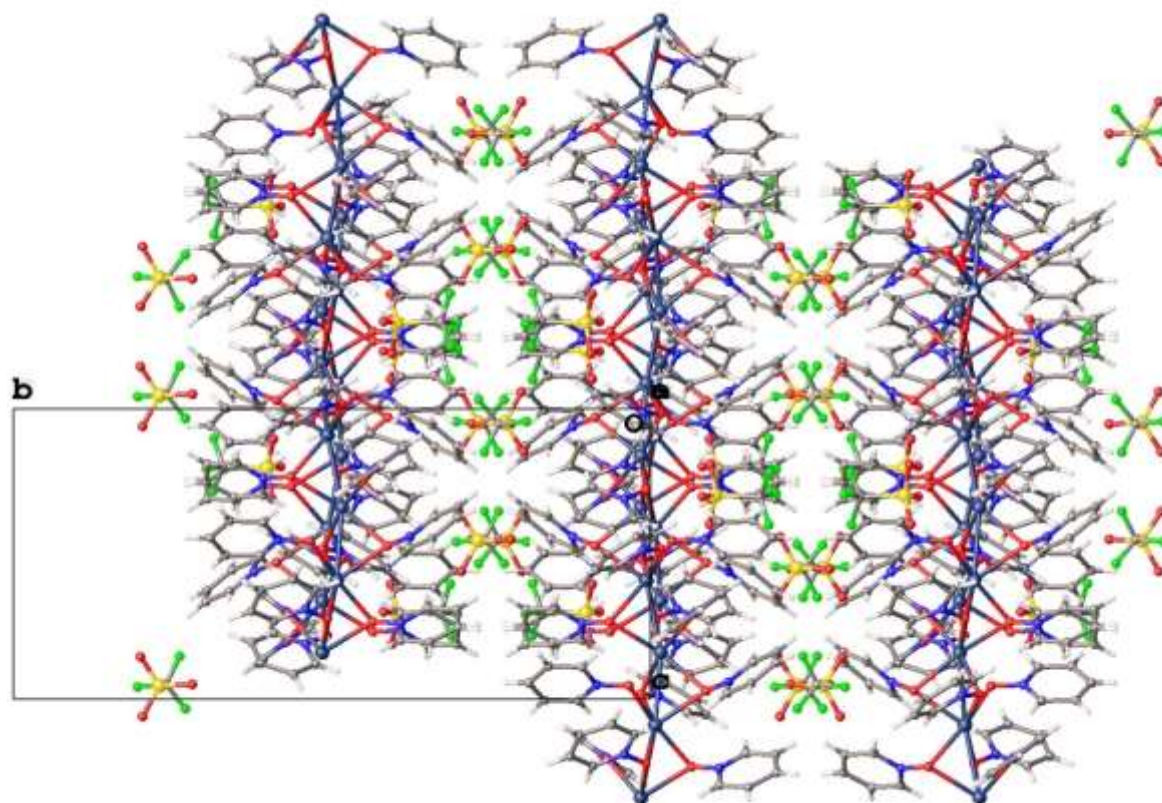

Figure S6: View of the packing of the  $[\text{Ag}(\text{py-O})_3]_{\infty}$  moieties and anions in the structure of  $[\text{Ag}(\text{py-O})_3][\text{OTf}]$ .

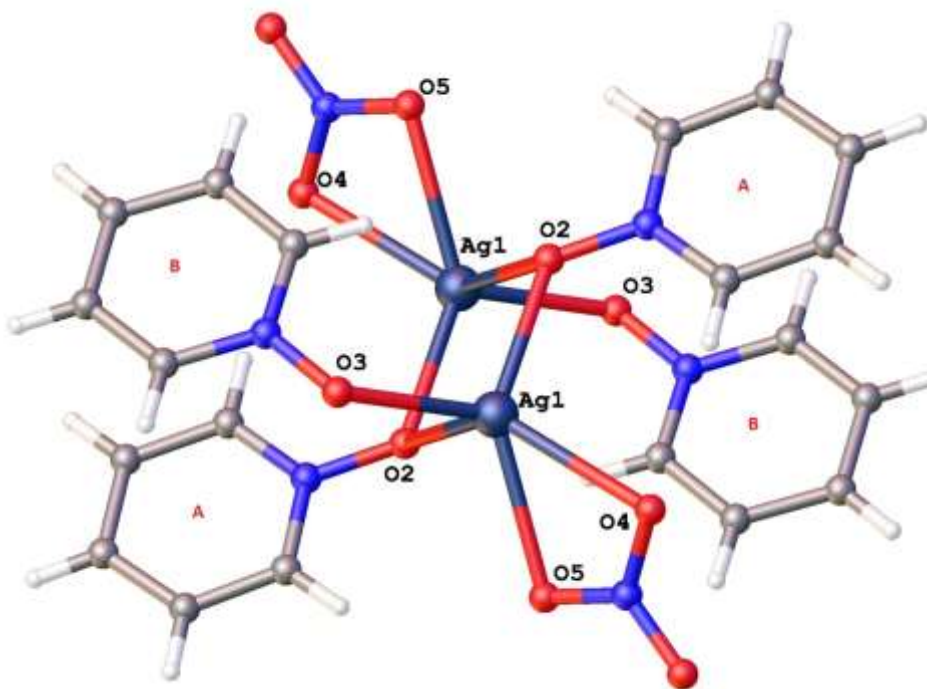

Figure S7: View of the crystal structure of  $[Ag(py-O)_2][NO_3]$  showing dimeric  $[Ag_2(py-O)_4(NO_3)_2]$  moiety formed.

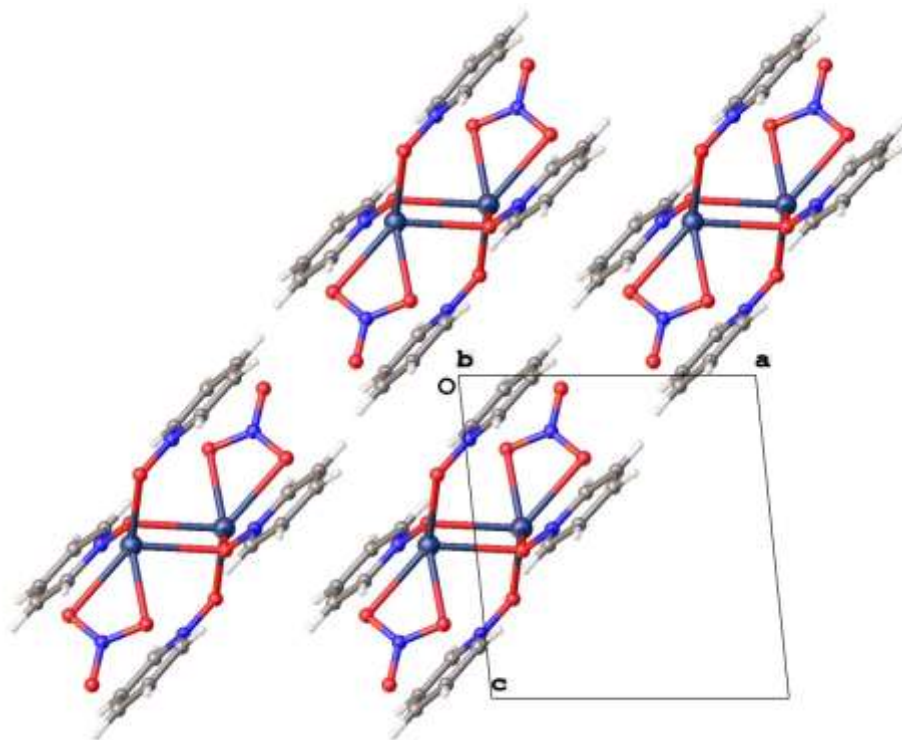

Figure S8: View of the packing in the crystal structure of [Ag(py-O)<sub>2</sub>][NO<sub>3</sub>].

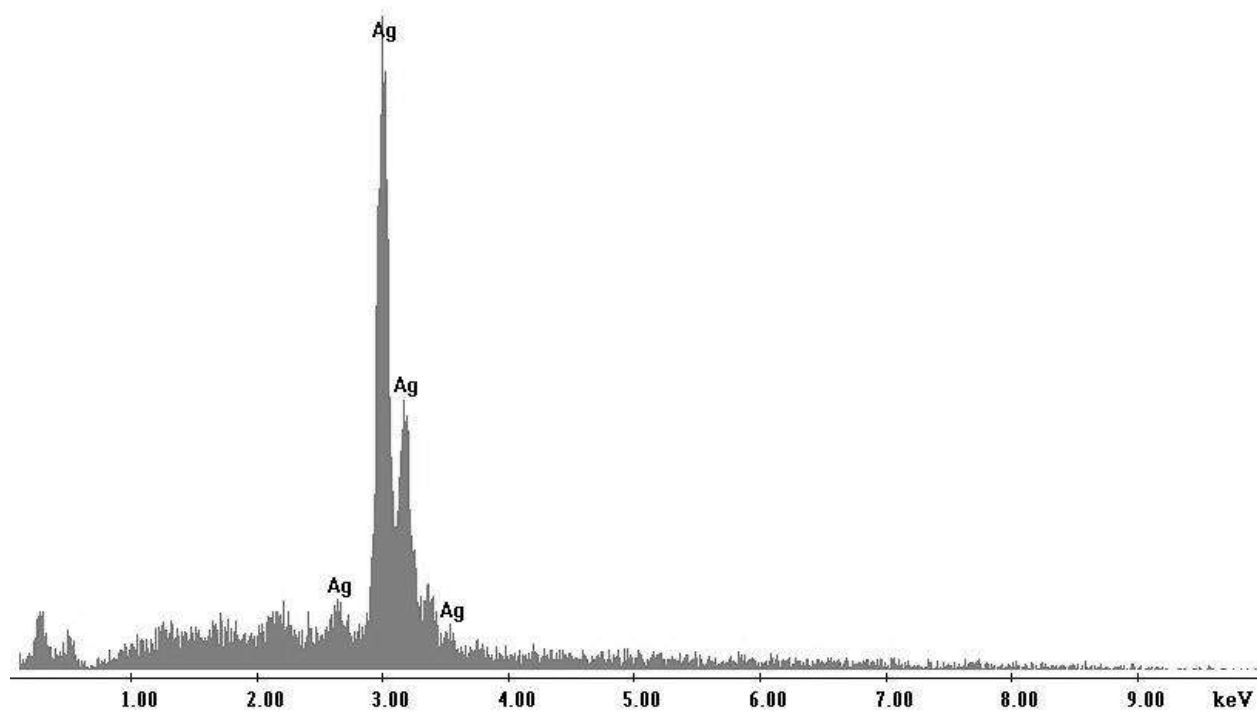

Figure S9: EDX spectrum of a silver deposit of  $[\text{Ag}(\text{pyO})_3][\text{NO}_3]$  plated at  $-1.0 \text{ A dm}^{-2}$  for 60 seconds at  $90^\circ\text{C}$  showing only peaks of silver, indicating that the gold substrate is completely covered and the deposits are pure silver.
